# Supplementary material for: Synthesis and retention properties of molecularly imprinted polymers for antibiotics containing a 5-nitrofuran ring
Source: Royal Society of Chemistry journal article supplement (doi:10.1039/c7ra10196a), 2017-01-01
Supplement: c7ra10196a1.pdf [file c7ra10196a1.pdf]

**Synthesis and retention properties of molecularly imprinted polymers for antibiotics  
containing 5-nitrofuran ring**

**Electronic supplementary information**

Edina Rusen,<sup>1</sup> Aurel Diacon,<sup>1</sup> Alexandra Mocanu,<sup>1</sup> Florentina Rizea,<sup>1</sup> Bogdan Bucur,<sup>2\*</sup>  
Madalina Petruta Bucur,<sup>2</sup> Gabriel-Lucian Radu,<sup>2</sup> Elena Bacalum,<sup>3</sup> Mihaela Cheregi,<sup>4</sup>  
Victor David<sup>4</sup>

<sup>1</sup> University Politehnica of Bucharest, Faculty of Applied Chemistry and Materials Science,  
Dept. Bioresources & Polymer Sci, 1-7 Gh Polizu St, Bucharest 011061, Romania

<sup>2</sup> Centre of Bioanalysis, National Institute of Research and Development of Biological  
Sciences, 296, Splaiul Independentei, Bucharest, 060031, Romania

<sup>3</sup> University of Bucharest, Research Institute - ICUB, Blvd. M. Kogalniceanu, no. 36-46,  
Bucharest, 050107, Romania

<sup>4</sup> University of Bucharest, Faculty of Chemistry, Department of Analytical Chemistry, Sos.  
Panduri, no 90, Bucharest 050663, Romania

\* Corresponding author: bucurica@yahoo.com; Tel.: +40-021-22-00-900

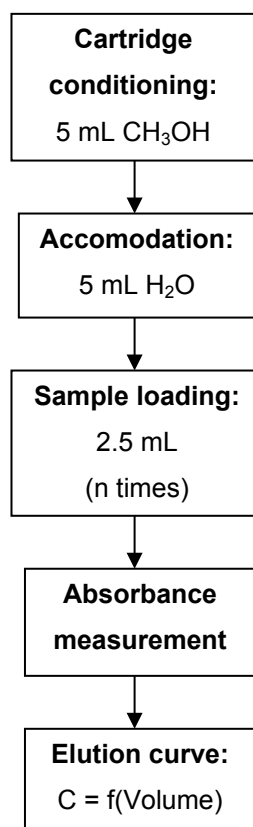

**Figure ESM-1.** Diagram of the SPE procedure used for elution curve

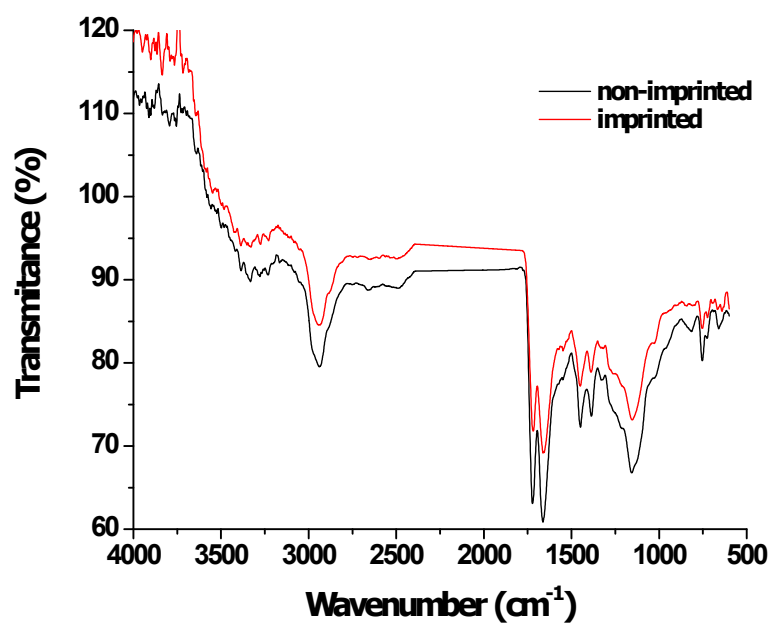

**Figure ESM-2.** FT-IR spectra for MIP-F3 and the corresponding NIP.

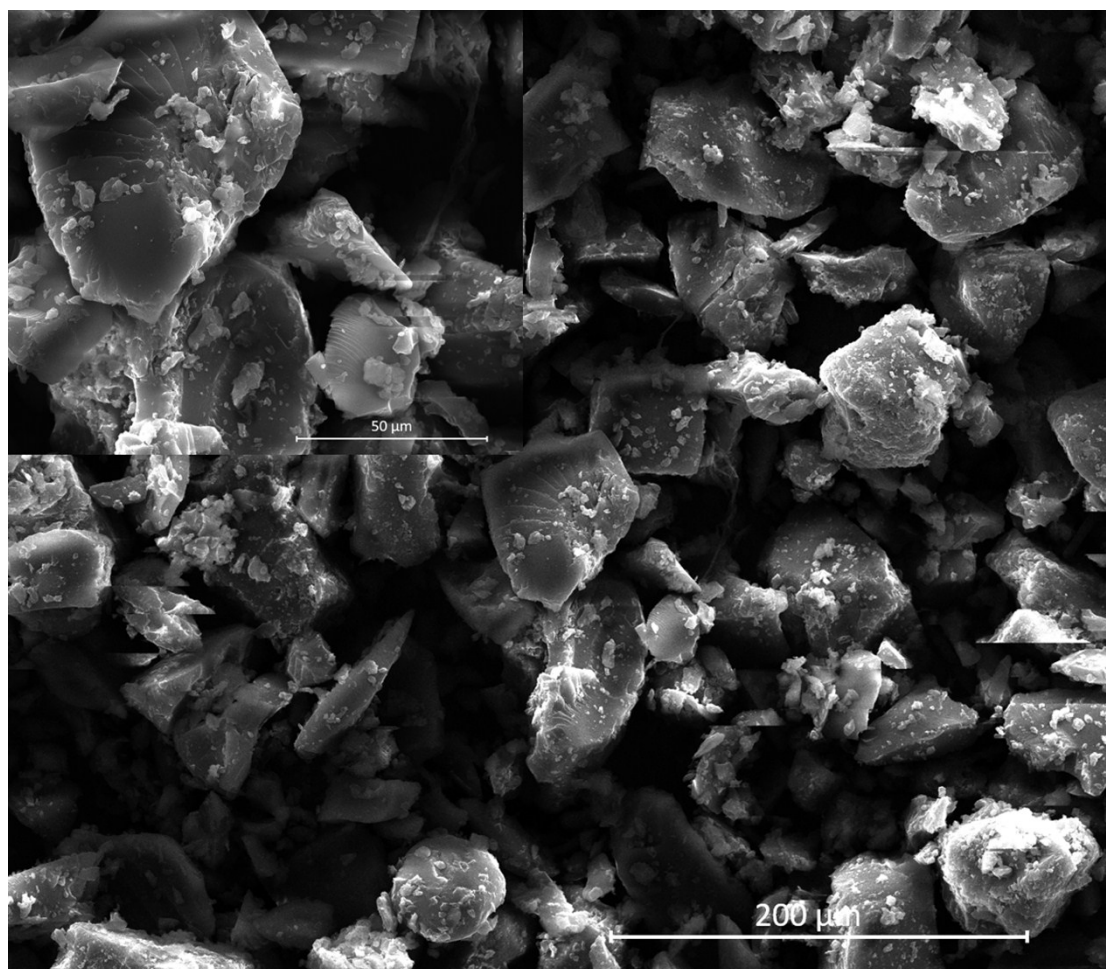

**Figure ESM-3.** SEM images at different magnifications for MIP-F3

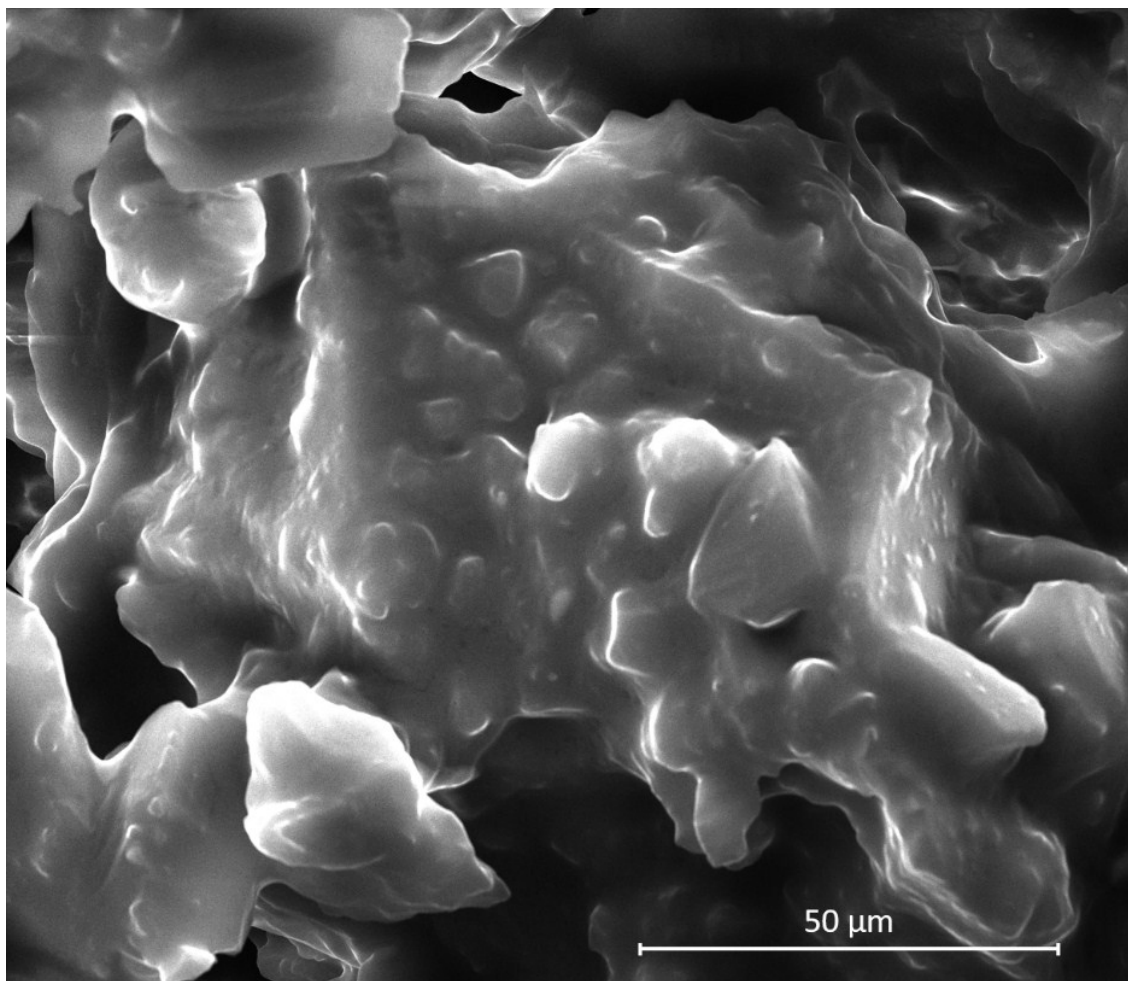

**Figure ESM-4.** SEM images for MIP-N3 after extraction of nitrofurantoin
